# Supplementary material for: Nutritional Value, Volatile Components, Functional Metabolites, and Antibacterial and Cytotoxic Activities of Different Parts of Millettia speciosa Champ., a Medicinal and Edible Plant with Potential for Development
Source: MDPI journal article supplement (doi:10.3390/plants12223900), 2023-11-19
Supplement: s1 [file s1]

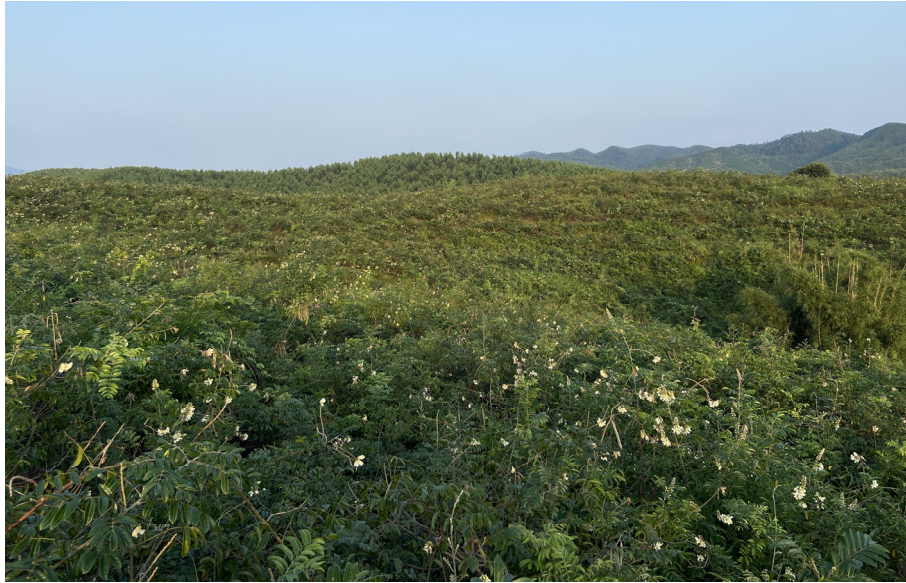

Panoramic view

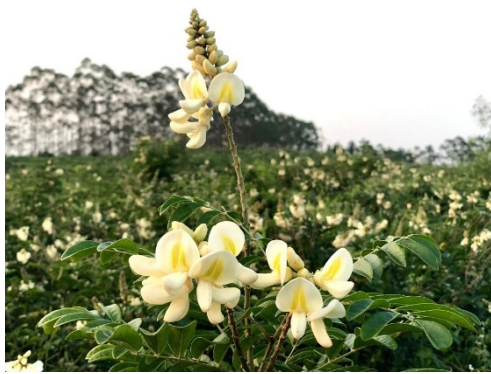

Flower

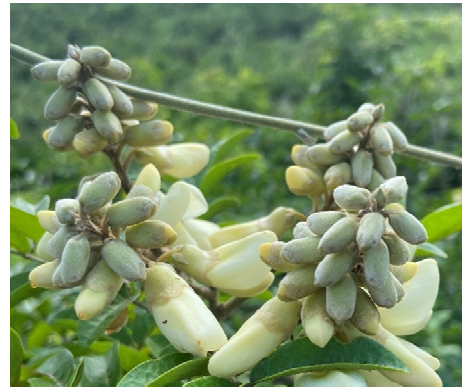

Seed and seed pod

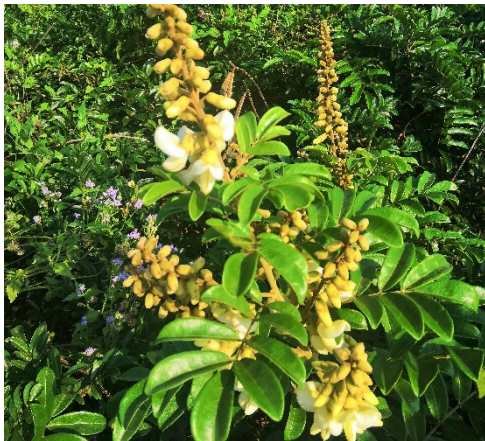

Aboveground parts

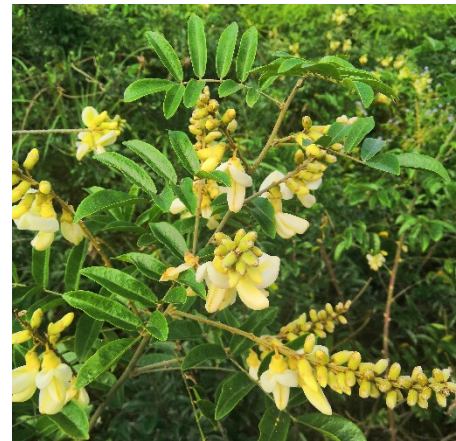

Aboveground parts

**Figure S1** Panoramic view and above ground portion of *Millettia speciosa* planting

**Table S1** Amino acid standard weighed value and molecular weight when configuring  
1  $\mu\text{mol/mL}$  mixed amino acid standard stock solution

| Amino acid name           | Amino acid mass (mg) | Molar mass (g/mol) |
|---------------------------|----------------------|--------------------|
| L-Aspartic acid           | 33                   | 133.1              |
| L-Threonine               | 30                   | 119.1              |
| L-Serine                  | 26                   | 105.1              |
| L-Glutamic acid           | 37                   | 147.1              |
| L-Proline                 | 29                   | 115.1              |
| Glycine                   | 19                   | 75.07              |
| L-Alanine                 | 22                   | 89.06              |
| L-Contributory            | 29                   | 117.2              |
| L-Methionine              | 37                   | 149.2              |
| L-Isoleucine              | 33                   | 131.2              |
| L-Leucine                 | 33                   | 131.2              |
| L-Tyrosine                | 45                   | 181.2              |
| L-Phenylalanine           | 41                   | 165.2              |
| L-Histidine hydrochloride | 52                   | 209.7              |
| L-Lysine hydrochloride    | 46                   | 182.7              |
| L-Arginine hydrochloride  | 53                   | 210.7              |

**Table S2** Antibacterial activities of different extracts from *M. speciosa* (concentration of test samples 30 mg/mL)

| Test bacteria          | Inhibitory circle diameter (mm) |                |                |                |               |
|------------------------|---------------------------------|----------------|----------------|----------------|---------------|
|                        | AC                              | Seed pods      | Flowers        | Branches       | Leaves        |
| <i>R. solanacearum</i> | 19.40 ± 0.36 d                  | 14.43 ± 0.51 g | 13.53 ± 0.40 g | 9.00 ± 0.80 ij | 6.00 ± 0.00 k |
| <i>A. tumefaciens</i>  | 26.90 ± 0.35 a                  | 15.93 ± 0.51 f | 12.30 ± 1.00 h | 10.10 ± 1.13 i | 6.00 ± 0.00 k |
| <i>S. haemolyticus</i> | 17.57 ± 0.23 e                  | 11.60 ± 0.26 h | 12.33 ± 1.35 h | 6.00 ± 0.00 k  | 6.00 ± 0.00 k |
| <i>B. subtilis</i>     | 22.83 ± 0.15 b                  | 7.13 ± 0.12 k  | 11.67 ± 0.61 h | 6.00 ± 0.00 kk | 7.50 ± 0.40 k |
| <i>X. vesicatoria</i>  | 20.83 ± 0.72 c                  | 11.80 ± 0.17 h | 10.13 ± 0.12 i | 8.53 ± 0.40 j  | 7.30 ± 0.90 k |
| <i>P. lachrymans</i>   | 23.57 ± 0.51 b                  | 12.30 ± 0.50 h | 14.67 ± 0.35 g | 9.53 ± 2.40 ij | 6.00 ± 0.00 k |

Note: AC means the positive control streptomycin sulfate at 10 mg/mL.

**Table S3** Antibacterial activities of different extracts from *M. speciosa* (concentration of test samples 60 mg/mL)

| Test bacteria          | Inhibitory circle diameter (mm) |                 |                |                 |                 |
|------------------------|---------------------------------|-----------------|----------------|-----------------|-----------------|
|                        | AC                              | Seed pods       | Flowers        | Branches        | Leaves          |
| <i>R. solanacearum</i> | 19.40 ± 0.36 d                  | 18.43 ± 0.32 de | 15.00 ± 0.44 f | 12.43 ± 0.23 g  | 8.00 ± 1.11 k   |
| <i>A. tumefaciens</i>  | 26.90 ± 0.35 a                  | 12.83 ± 0.15 g  | 12.73 ± 0.75 g | 10.87 ± 1.37 hi | 12.03 ± 0.29 gh |
| <i>S. haemolyticus</i> | 17.57 ± 0.23 e                  | 12.73 ± 0.84 g  | 14.23 ± 0.06 f | 9.30 ± 0.50 ij  | 6.00 ± 0.00 l   |
| <i>B. subtilis</i>     | 22.83 ± 0.15 b                  | 10.83 ± 0.96 hi | 9.50 ± 0.70 ij | 6.00 ± 0.00 l   | 10.90 ± 2.52 hi |
| <i>X. vesicatoria</i>  | 20.83 ± 0.72 c                  | 15.07 ± 0.60 f  | 15.17 ± 0.35 f | 8.97 ± 0.25 ij  | 11.43 ± 0.75 gh |
| <i>P. lachrymans</i>   | 23.57 ± 0.51 b                  | 14.23 ± 0.06 f  | 19.03 ± 0.58 d | 9.07 ± 0.40 ij  | 12.47 ± 1.82 g  |

Note: AC means the positive control streptomycin sulfate at 10 mg/mL.

**Table S4** Antibacterial activities of different extracts from *M. speciosa* (concentration of test samples 90 mg/mL)

| Test bacteria          | Inhibitory circle diameter (mm) |                  |                 |                 |                 |
|------------------------|---------------------------------|------------------|-----------------|-----------------|-----------------|
|                        | AC                              | Seed pods        | Flowers         | Branches        | Leaves          |
| <i>R. solanacearum</i> | 19.40 ± 0.36 f                  | 18.73 ± 0.46 fg  | 19.67 ± 0.85 ef | 15.07 ± 1.02 jk | 13.73 ± 0.25 l  |
| <i>A. tumefaciens</i>  | 26.90 ± 0.35 a                  | 15.90 ± 0.72 ij  | 19.43 ± 1.00 f  | 10.30 ± 0.50 no | 8.33 ± 0.47 p   |
| <i>S. haemolyticus</i> | 17.57 ± 0.23 gh                 | 15.57 ± 1.21 ijk | 15.10 ± 0.17 jk | 10.10 ± 1.28 o  | 8.50 ± 0.30 p   |
| <i>B. subtilis</i>     | 22.83 ± 0.15 bc                 | 11.87 ± 0.12 m   | 12.10 ± 0.85 m  | 8.53 ± 0.64 p   | 12.07 ± 1.10 m  |
| <i>X. vesicatoria</i>  | 20.83 ± 0.72 de                 | 15.50 ± 1.20 ijk | 14.40 ± 0.53 kl | 11.67 ± 1.33 m  | 11.50 ± 0.20 mn |
| <i>P. lachrymans</i>   | 23.57 ± 0.51 b                  | 16.43 ± 0.23 hi  | 22.00 ± 1.00 cd | 11.53 ± 0.40 mn | 12.27 ± 0.75 m  |

Note: AC means the positive control streptomycin sulfate at 10 mg/mL.

**Table S5** Cytotoxic activities of different extracts from *M. speciosa*

| Extracts  | IC <sub>50</sub> value (mg/mL) |
|-----------|--------------------------------|
| Seed pods | 0.37 ± 0.03                    |
| Flowers   | 0.27 ± 0.03                    |
| Leaves    | 0.71 ± 0.04                    |
| Branches  | 0.55 ± 0.02                    |

**Table S6** Antifungal activities of different extracts from *M. speciosa*

| Pathogenic fungi<br>for testing | EC <sub>50</sub> value (µg/mL) |               |                 |                |
|---------------------------------|--------------------------------|---------------|-----------------|----------------|
|                                 | AC                             | Seed pods     | Branches        | Leaves         |
| <i>P. elaeocarpicola</i>        | 0.23 ± 0.0023                  | 139.30 ± 5.70 | 29.57 ± 7.20    | 18.28 ± 0.54   |
| <i>C. gloeosporioides</i>       | 0.35 ± 0.035                   | 780.23 ± 9.62 | 1067.91 ± 42.09 | 568.21 ± 33.60 |

Note: AC means the positive control carbendazim.
